# Supplementary material for: Impact of humic acid on the fate and toxicity of titanium dioxide nanoparticles in Tetrahymena pyriformis and zebrafish embryos
Source: Royal Society of Chemistry journal article supplement (doi:10.1039/c8na00053k), 2018-08-17
Supplement: c8na00053k1.pdf [file c8na00053k1.pdf]

**Supplementary information**

**Impact of humic acid in fate and toxicity of titanium dioxide nanoparticles in  
*Tetrahymena pyriformis* and early stage zebrafish embryos**

Govind Sharan Gupta<sup>†</sup>, Krupa Kansara<sup>†</sup>, Helly Shah, Ruchi Rathod, Drishti Valecha, Saurabh Gogisetty, Pankti Joshi and Ashutosh Kumar\*

Division of Biological & Life Sciences, School of Arts & Sciences, Ahmedabad University,  
Central campus, Navrangpura, Ahmedabad, 380009, Gujarat, India

<sup>†</sup>Authors contributed equal first author

\*Corresponding author

Ashutosh Kumar  
Division of Biological & Life Sciences  
School of Arts & Sciences, Ahmedabad University  
Central Campus, Navrangpura, Ahmedabad, 380009, Gujarat, India  
Email- ashutosh.kumar@ahduni.edu.in

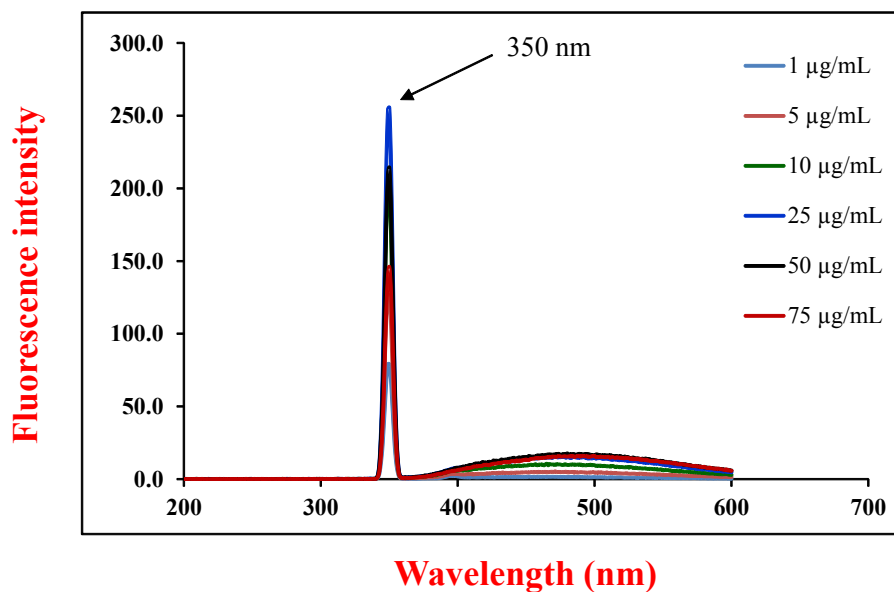

**Figure S1:** Fluorescence emitting property of humic acid in MilliQ water.

**Table S1:** pH of TiO<sub>2</sub> NPs in different buffers in the presence and absence of humic acid.

| Sample ID                            | pH              |               |           |
|--------------------------------------|-----------------|---------------|-----------|
|                                      | Milli – Q water | Dryl’s buffer | E3 medium |
| TiO <sub>2</sub> NPs (50 µg/mL)      | 6.73            | 6.86          | 6.91      |
| TiO <sub>2</sub> NPs (50 µg/mL) + HA | 6.75            | 6.86          | 6.85      |

**Table S2:** Polydispersity index of TiO<sub>2</sub> NPs (50 μg/mL) in different experimental buffers and in the presence and absence of humic acid (HA)

| Time (h) | MilliQ Water |           | Dryl's buffer |           | E3 medium |           |
|----------|--------------|-----------|---------------|-----------|-----------|-----------|
|          | -HA          | +HA       | -HA           | +HA       | -HA       | +HA       |
| 0        | 0.3 ± 0.0    | 0.2 ± 0.0 | 0.2 ± 0.0     | 0.2 ± 0.0 | 0.4 ± 0.1 | 0.3 ± 0.1 |
| 1        | 0.2 ± 0.0    | 0.2 ± 0.0 | 0.2 ± 0.0     | 0.2 ± 0.0 | 0.4 ± 0.1 | 0.3 ± 0.0 |
| 2        | 0.3 ± 0.0    | 0.2 ± 0.0 | 0.2 ± 0.0     | 0.3 ± 0.1 | 0.4 ± 0.1 | 0.2 ± 0.0 |
| 3        | 0.2 ± 0.0    | 0.2 ± 0.0 | 0.2 ± 0.0     | 0.3 ± 0.0 | 0.4 ± 0.2 | 0.4 ± 0.1 |
| 4        | 0.3 ± 0.0    | 0.2 ± 0.0 | 0.2 ± 0.0     | 0.3 ± 0.1 | 0.3 ± 0.1 | 0.3 ± 0.1 |
| 24       | 0.3 ± 0.0    | 0.2 ± 0.0 | 0.2 ± 0.0     | 0.3 ± 0.1 | 0.3 ± 0.0 | 0.2 ± 0.1 |
| 48       | 0.3 ± 0.0    | 0.3 ± 0.0 | 0.3 ± 0.0     | 0.4 ± 0.0 | 0.3 ± 0.1 | 0.3 ± 0.1 |
| 96       | 0.2 ± 0.0    | 0.2 ± 0.0 | 0.3 ± 0.1     | 0.2 ± 0.0 | 0.3 ± 0.0 | 0.3 ± 0.1 |
